# Supplementary material for: Contrasting Food Web Factor and Body Size Relationships with Hg and Se Concentrations in Marine Biota
Source: PubMed Central journal article supplement (PMC3760827; doi:10.1371/journal.pone.0074695), 2013-09-03

Figure S3.

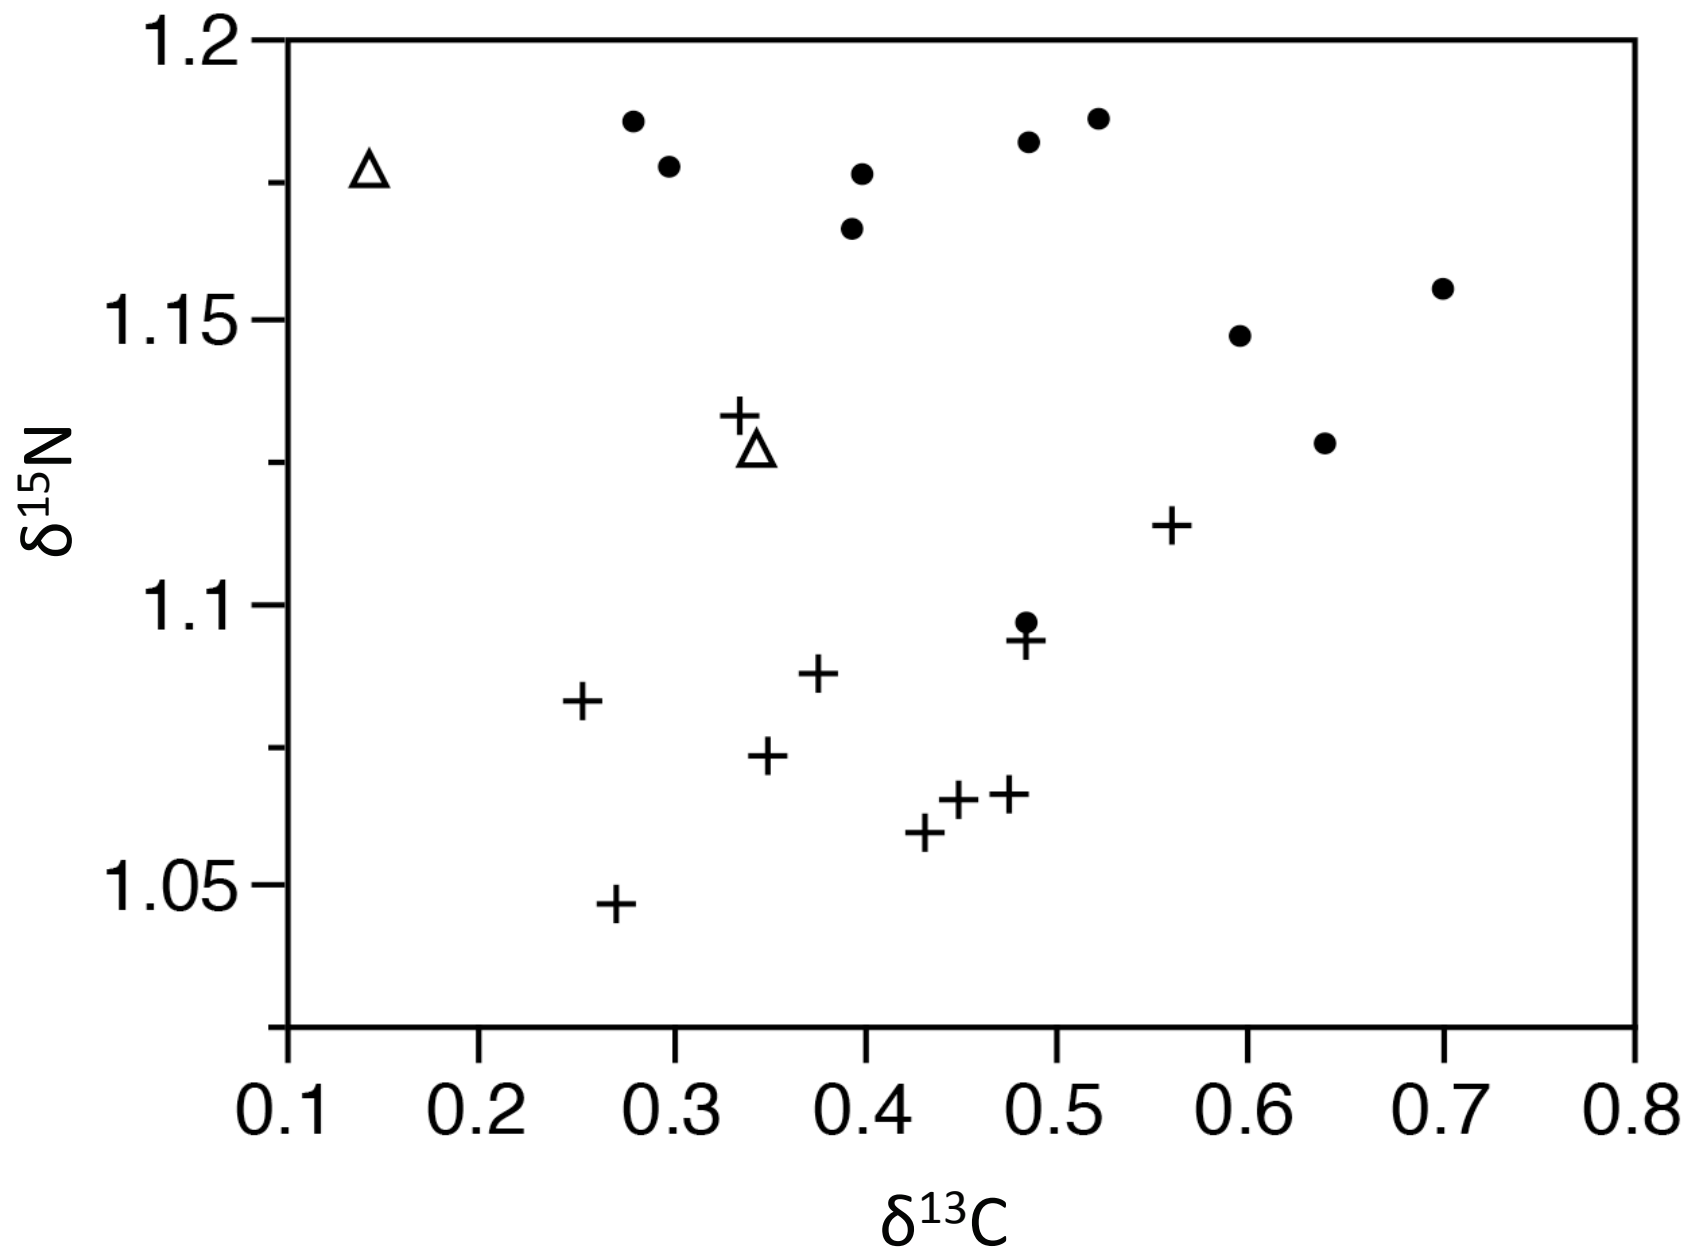

Supplement: pone.0074695.s003.pdf [file pone.0074695.s003.pdf]
